# Supplementary material for: Comprehensive insights into cellulose structure evolution via multi-perspective analysis during a slow pyrolysis process
Source: Royal Society of Chemistry journal article supplement (doi:10.1039/c8se00166a), 2018-01-01
Supplement: c8se00166a1.pdf [file c8se00166a1.pdf]

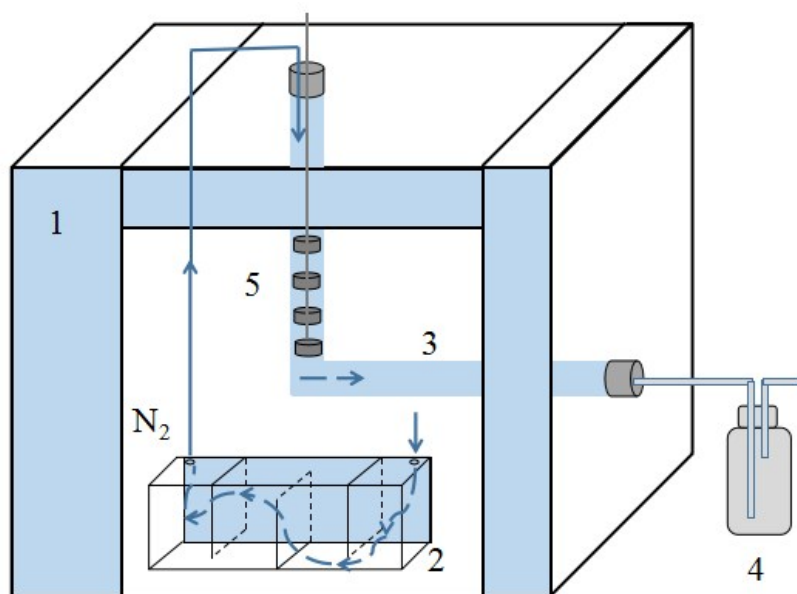

Supplement Fig. 1 The schematic of self-designed pyrolysis tubular reactor; (1) High temperature oven; (2) Gas preheating device; (3) Quartz tube; (4) Condensed product collection unit; (5) Quartz basket
