# Supplementary material for: Comprehensive insights into cellulose structure evolution via multi-perspective analysis during a slow pyrolysis process
Source: Royal Society of Chemistry journal article supplement (doi:10.1039/c8se00166a), 2018-01-01
Supplement: c8se00166a4.pdf [file c8se00166a4.pdf]

Supplement Table 1. FTIR band assignments of cellulose and its derivative during the pyrolysis process

| No. | Wavenumber/cm <sup>-1</sup> | Functional group                                                                                                                         |
|-----|-----------------------------|------------------------------------------------------------------------------------------------------------------------------------------|
| 1   | 3420                        | O-H stretching vibration                                                                                                                 |
| 2   | 3046                        | aromatic C-H stretching vibration                                                                                                        |
| 3   | 2900-2921                   | aliphatic C-H stretching vibration                                                                                                       |
| 4   | 2869                        | aliphatic C-H stretching vibration                                                                                                       |
| 5   | 1705                        | carbonyl stretching vibration of carboxylic groups, aldehydes, ketones                                                                   |
| 6   | 1641                        | O-H bending                                                                                                                              |
| 7   | 1600                        | C=O stretching vibration, aromatic C=C vibration                                                                                         |
| 8   | 1432                        | CH <sub>2</sub> at C-6 bending (sym)                                                                                                     |
| 9   | 1428                        | aromatic skeletal vibration combined with C-H in plane deformation or asymmetric C-O stretch of C-O stretching vibration from carbonates |
| 10  | 1421/1433                   | Aromatic C=C ring structure                                                                                                              |
| 11  | 1373                        | C-H bending                                                                                                                              |
| 12  | 1373                        | Aliphatic CH <sub>3</sub> deformation                                                                                                    |
| 13  | 1337                        | C-OH in plane at C-2 or C-3 bending                                                                                                      |
| 14  | 1319                        | CH <sub>2</sub> (wagging) at C-6 bending                                                                                                 |
| 15  | 1282                        | C-H bending                                                                                                                              |
| 16  | 1236                        | C-OH in plane at C-6 bending                                                                                                             |
| 17  | 1236/1223/1171              | Aromatic C=O stretching                                                                                                                  |
| 18  | 1165                        | C-O-C β-glucosidic linkage stretching                                                                                                    |
| 19  | 1113                        | ring in plane stretching                                                                                                                 |
| 20  | 1113                        | Aromatic C=O stretching                                                                                                                  |
| 21  | 1058                        | C=O at C-3 stretching; C-C stretching                                                                                                    |
| 22  | 1054                        | Aromatic C=O stretching                                                                                                                  |
| 23  | 1031                        | C=O at C-6 stretching                                                                                                                    |
| 24  | 896                         | C-O-C at β-glycosidic linkage stretching; C-O-C, C-C=O, and C-C-H at C-5 and C-6 stretching                                              |
| 25  | 879                         | aromatic C-H out of plane deformation C-O out of plane deformation from carbonates 1 adjacent H deformation                              |
| 26  | 810                         | 2 adjacent H deformations                                                                                                                |
