# Supplementary figures and images for: Comprehensive insights into cellulose structure evolution via multi-perspective analysis during a slow pyrolysis process
Source: Royal Society of Chemistry journal article supplement (doi:10.1039/c8se00166a), 2018-01-01

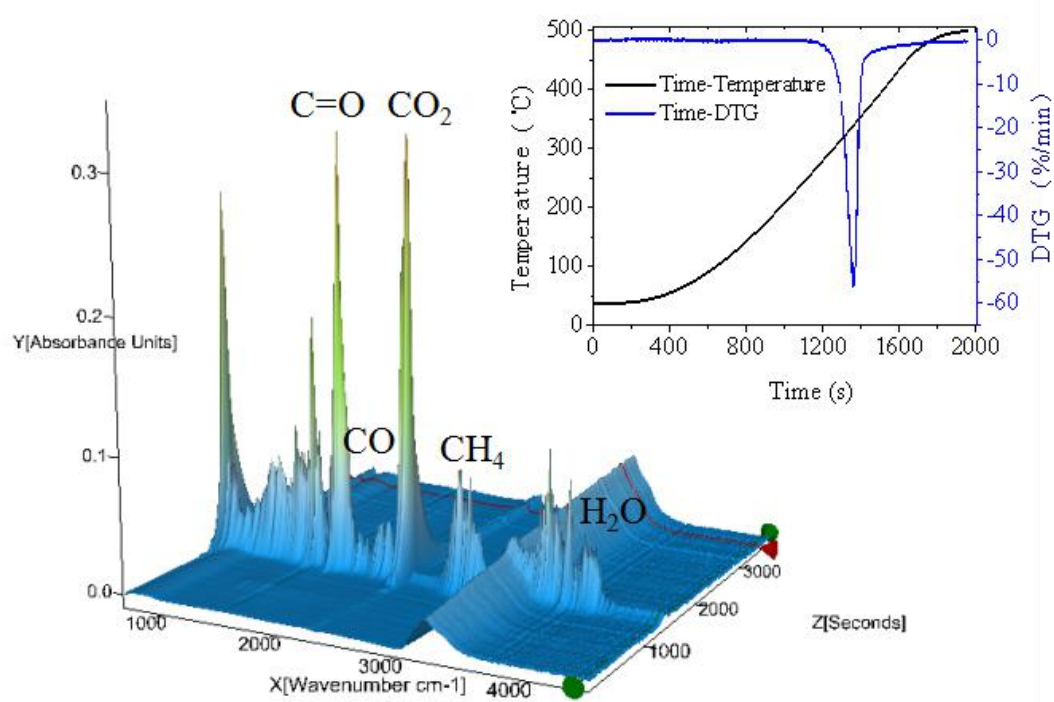

Supplement Fig. 2 3D FTIR spectrum of cellulose slow pyrolysis in TG-FTIR

Supplement: c8se00166a2.pdf [file c8se00166a2.pdf]

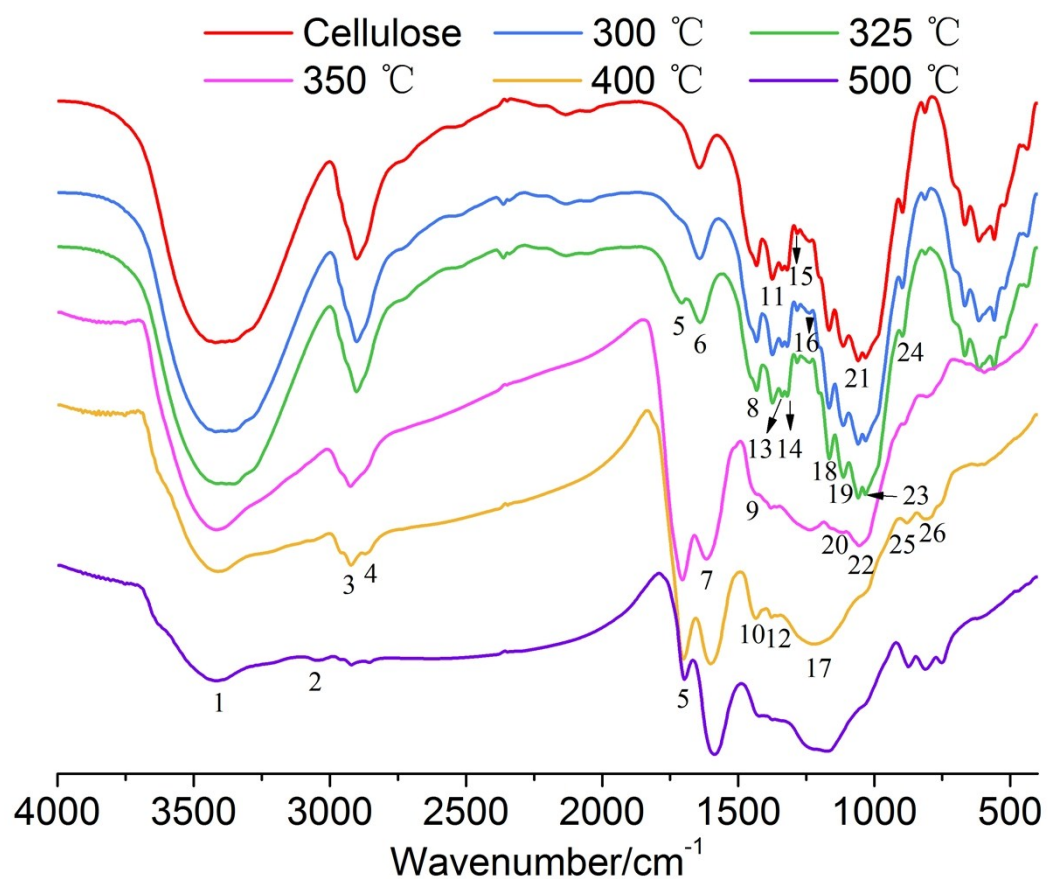

Supplement Fig. 3 FTIR spectra evolution of the cellulose slow pyrolysis process

Supplement: c8se00166a3.pdf [file c8se00166a3.pdf]
